# Supplementary material for: Skin tissue repair materials from bacterial cellulose by a multilayer fermentation method
Source: Royal Society of Chemistry journal article supplement (doi:10.1039/c2jm00134a), 2012-01-01
Supplement: c2jm00134a.pdf [file c2jm00134a.pdf]

† Electronic Supplementary Information (ESI) available: [details of any supplementary information available should be included here]. See DOI: 10.1039/b000000x/

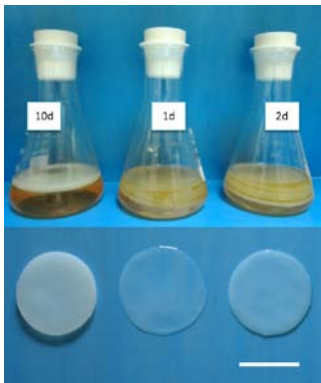

**Fig. S1** The picture shows the difference between static fermentation of BC film and improved multilayer fermentation of BC film: *G. xylinus* was fermented for 10 days. Left: static fermentation of BC film (normal); middle: shake every day, multilayer fermentation of thin BC film and right: shake every 2 days, multilayer fermentation of thick BC film. The scale bar equals 5 cm.

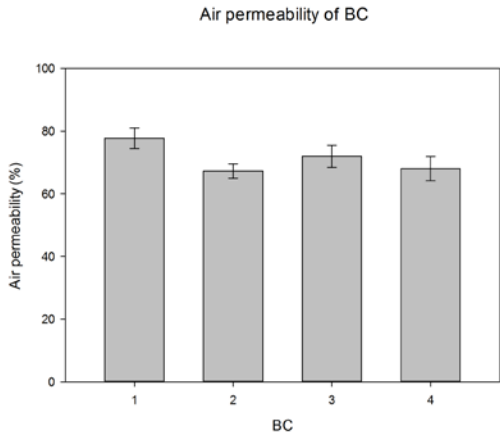

**Fig. S2** The air permeability of different BC films was investigated for 24 hours at room temperature. The thicknesses were measured after frozen drying. BC1 = 0.067 mm, BC2 = 0.315 mm, BC3 = 0.058 mm, BC4 = 0.739 mm.

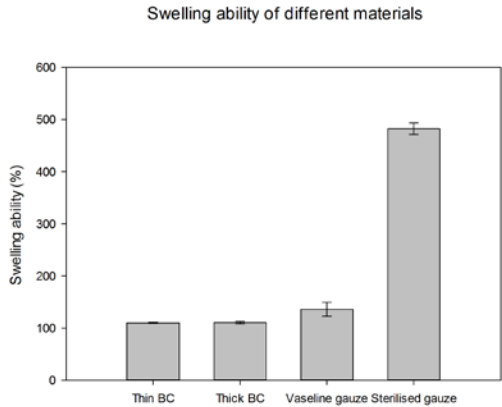

**Fig. S3** The swelling ability of different materials was investigated in phosphate buffered saline for 24 hours at room temperature.

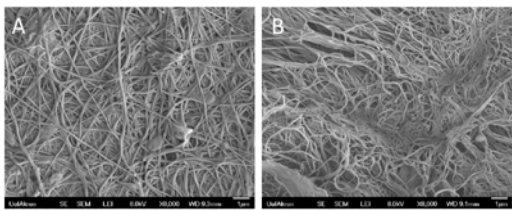

**Fig. S4** SEM microphotographs of the thick BC film: (A) before the purification of NaOH; (B) after the purification of NaOH. The entire scale bars equal 1 µm.

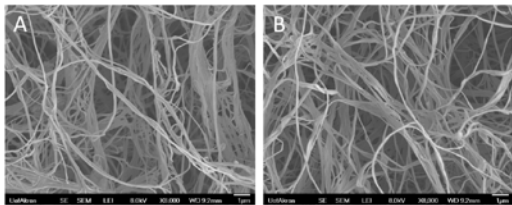

**Fig. S5** SEM microphotographs of (A) the thick BC film and (B) the BC film (normal). Both the porous opposite sides were formed in the culture medium for 2 days (A) and 10 days (B). The scale bars equal 1 µm.

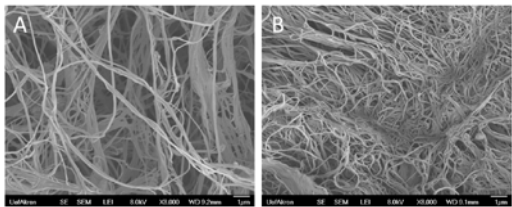

**Fig. S6** SEM microphotographs of the thick BC film: (A) porous opposite side that was formed in the culture medium; (B) denser surface side that was formed at the interface between air and culture medium. The scale bars equal 1 µm.

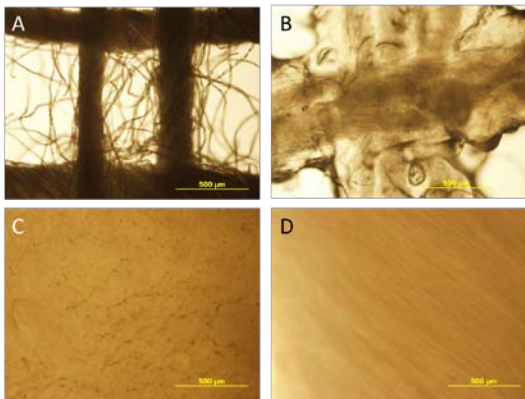

**Fig. S7** Microphotographs of gauzes and BC films were observed by an Olympus polarizing microscope (BH-2, Olympus Inc., Japan): (A) the gauze shows a smoother structure than the Vaseline gauze; (B) the Vaseline gauze shows a larger fleece than the gauze; (C) compared to the gauzes, the thin BC film shows a compact surface; (D) the thin BC film shows a smooth and linear surface. The entire scale bars equal 500 µm.

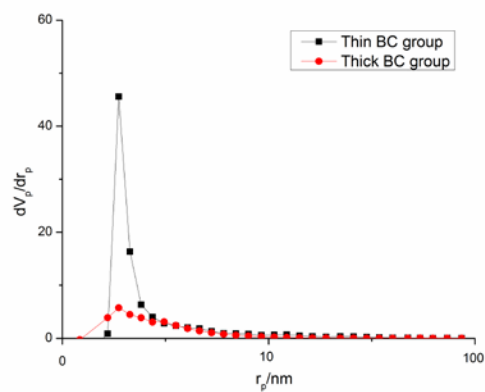

**Fig. S8** Pore-size distribution for two kinds of BC from BJH analysis based on pore area.

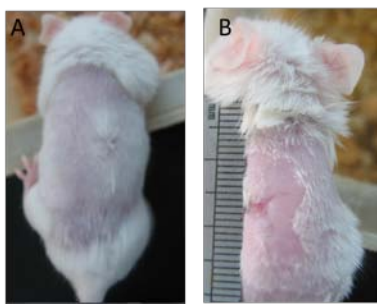

**Fig. S9** (A) the thick BC group on day 17 showed bushy hair around the wound area; (B) the mouse skin group on day 17 showed sparse hair around the wound area.

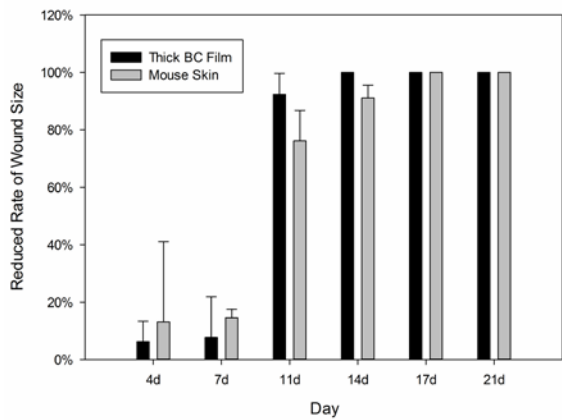

**Fig. S10** The reduction rates of the thick BC group and the mouse skin group.

**Table S1** Surface area  $a_{s,BET}$ , relative pressure  $p/p_0$  and total pore volume (TPV) of BC

| Samples  | $a_{s,BET}$<br>( $m^2/g$ ) | $p/p_0$ | TPV( $N_2$ )<br>( $cm^3/g$ ) | C      | Average pore diameter<br>(nm) |
|----------|----------------------------|---------|------------------------------|--------|-------------------------------|
| Thin BC  | 5.0068                     | 0.985   | 0.030515                     | 178.52 | 24.379                        |
| Thick BC | 0.64654                    | 0.990   | 0.011642                     | 236    | 72.027                        |

**Table S2** The animal model was full-thickness skin injury in BALB/c mouse. Using one animal model, seven groups were investigated in the mouse surgery. Results are shown here.

| Materials        | Category                  | Immunorejection                             |
|------------------|---------------------------|---------------------------------------------|
| Sterilised gauze | Commodity materials group | No active antigen, no immunorejection       |
| Vaseline gauze   | Commodity materials group | No active antigen, no immunorejection       |
| Thin BC film     | Experimental group        | No active antigen, no immunorejection       |
| Thick BC film    | Experimental group        | No active antigen, no immunorejection       |
| Pig skin         | Xeno-transplant group     | The xeno-antigen caused immunorejection     |
| Rat skin         | Xeno-transplant group     | The xeno-antigen caused immunorejection     |
| Mouse skin       | Allo-transplant group     | The allo-antigen caused few immunorejection |
